# Supplementary material for: Understanding species responses in a changing world by examining the predatory behaviour of southern calamari to changes in temperature
Source: Frontiers journal article supplement (doi:10.3389/fmars.2023.1113984), 2023-04-19
Supplement: Table_1.XLSX [file Table_1.XLSX]

## Sheet: Sheet1
Temperature	id_animal	capture_time	acclimation_days	Sex	ML_mm	TW_gr	Predator-prey length relationship	attack_suscess	make_attack	nun_attemps	time_to_attack (sec)	time to attack (min )	handling time (sec)	body_posture	body_pattern	strike_distance_mm	tentacle elengation_mm
13C	T13R6	1	1	F	135	161.6	1.8	yes	yes	1	25	0.416667	20
13C	T13R7	1	1	F	137	149	1.44211	no	no	0
13C	T13R8	1	2	F	142	130.8	1.42	no	no	0
13C	T13R9	1	2	F	129	136.9	1.41758	no	yes	10	7	0.116667
13C	T13R10	1	3	M	140	144.3	1.53846	no	no	0
13C	T13R11	1	3	F	158	191.2	1.61224	no	no	0
16C	T16R1	4	1	M	180	249.9	1.53846	no	no	0
16C	T16R3	4	2	M	201	329.3	1.82727	no	no	0
16C	T16R4	4	2	M	215	414.1	1.95455	no	yes	2	82	1.36667
16C	T16R5	4	3	M	174	241.2	1.74	no	no	0
16C	T16R6	4	3	M	175	240.3	1.75	no	no	0
16C	T16R7	5	1	F	200	331	2.04082	no	no	0
16C	T16R8	5	1	M	175	230.1	1.78571	yes	yes	1	50	0.833333	10
16C	T16R9	5	2	M	231	502.6	1.97436	no	no	0
16C	T16R11	5	3	F	185	280.6	1.66667	no	no	0
16C	T16R12	5	3	F	166	218.1	1.4955	no	yes	6	14	0.233333
19C	T19R1	2	1	F	185	307.2	2.03297	yes	yes	2	60	1	18	upward point	dark	72.2	88.6
19C	T19R2	2	2	M	219	408	2.30526	yes	yes	1	75	1.25	17	donward point	dark	77.3	78.1
19C	T19R3	2	2	F	169	229.4	1.85714	yes	yes	1	10	0.166667	15	Horizontal arms	dark	23.5	22.3
19C	T19R4	2	2	M	142	130.4	1.57778	yes	yes	1	600	10	60	donward point	transparent	69.9	72.2
19C	T19R5	2	3	F	140	127.5	1.37255	no	yes	5	703.2	11.72
19C	T19R6	2	3	F	166	206.1	1.62745	yes	yes	3	600	10	40	upward point	dark	46.8
19C	T19R9	6	2	Na	169	205.1	1.42017	no	no	0
19C	T19R10	6	2	M	215	346.4	1.80672	no	yes	1	312	5.2
19C	T19R11	6	3	F	194	337.9	1.63025	no	no	0
19C	T19R12	6	3	M	172	226	1.44538	no	yes	3	27	0.45
22C	T22R3	3	2	F	170	212	1.47826	yes	yes	1	11	0.183333	50	Horizontal arms	transparent	76.2	81.4
22C	T22R5	3	3	F	164	174.9	1.4386	yes	yes	2	16	0.266667	121.8	upward point	dark	92.9	97.3
22C	T22R7	7	1	M	169	218.4	1.38525	no	no	0		0
22C	T22R8	7	1	M	165	192.9	1.35246	yes	yes	1	5	0.0833333	120	Horizontal arms	dark	107.2	86
22C	T22R12	7	3	F	170	247	1.47826	yes	yes	1	5	0.0833333	60	downpoint	dark	51.8	57.9
25C	T25R3	8	1	M	225	413.9	1.59574	yes	yes	1	4	0.0666667	120	upward point	dark	83.9	96.21
25C	T25R5	8	2	F	161	207.8	1.14184	yes	yes	2	5	0.0833333	189	upward point	transparent	109.8	121.7
25C	T25R6	8	3	F	189	247.3	2.1236	yes	yes	27	4	0.0666667	144	upward point	transparent	109.2	114.3
25C	T25R7	8	3	M	171	227.4	1.48696	yes	yes	1	3	0.05	60	donward point	dark	121.9	125.1
25C	T25R10	9	2	F	207	243.7	1.656	yes	yes	2	4	0.0666667	180	donward point	dark	131.4	103.3
25C	T25R12	9	3	M	210	327.4	1.66667	yes	yes	3	6	0.1	84	Horizontal arms	dark	62.97	84.3
25C	T25R13	9	3	M	180	231.8	1.29496	yes	yes	5	4	0.0666667	132	upward point	dark	123.06	114.6
